# Supplementary material for: Ultrasound assessment for grading structural tendon changes in supraspinatus tendinopathy: an inter-rater reliability study
Source: PubMed Central journal article supplement — BMJ Open. 2016 May 24;6(5):e011746. doi: 10.1136/bmjopen-2016-011746 (PMC4885468; doi:10.1136/bmjopen-2016-011746), 2016-05-24
Supplement: bmjopen-2016-011746supp.pdf [file bmjopen-2016-011746supp.pdf]

Appendix: Illustration of grading levels for fibrillar disruption and neovascularity

|         | Fibrillar disruption                                                                                                                                    | Neovascularity                                                                                                                                      |
|---------|---------------------------------------------------------------------------------------------------------------------------------------------------------|-----------------------------------------------------------------------------------------------------------------------------------------------------|
| Grade 0 | <p>Normal</p> 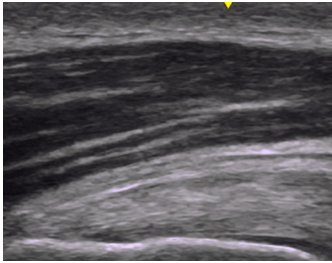                                                         | <p>Normal (No signal)</p>                                        |
| Grade 1 | <p>Mild (Involving under 25% of the height of the tendon)</p>          | <p>Mild (Single small signal in the Region Of Interest, ROI)</p>  |
| Grade 2 | <p>Moderate (Involving 25-50% of the height of the tendon)</p>       | <p>Moderate (Doppler activity in less than 25% of the ROI)</p>  |
| Grade 3 | <p>Severe (Involving more than 50% of the height of the tendon)</p>  | <p>Severe (Doppler activity in 25-50% of the ROI)</p>           |
| Grade 4 | <p>Partial rupture (Disruption of the fibers in the full thickness of the tendon)</p> <p>No picture available</p>                                       | <p>Extreme (Doppler activity in more than 50% of the ROI)</p>   |
